# Supplementary material for: Expression profiles and functional prediction of long non-coding RNAs LINC01133, ZEB1-AS1 and ABHD11-AS1 in the luminal subtype of breast cancer
Source: Springer Nature journal article supplement (doi:10.1186/s12967-021-03026-7), 2021-08-26

# Kaplan-meier Survival Functions

**A**

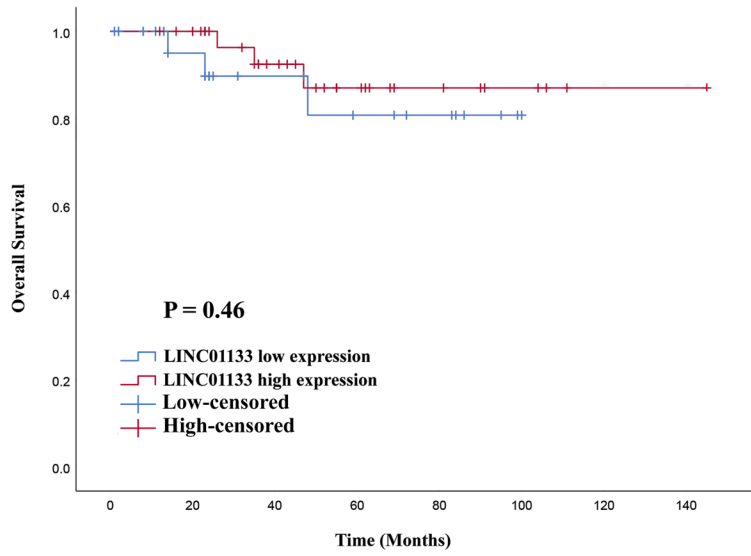

**B**

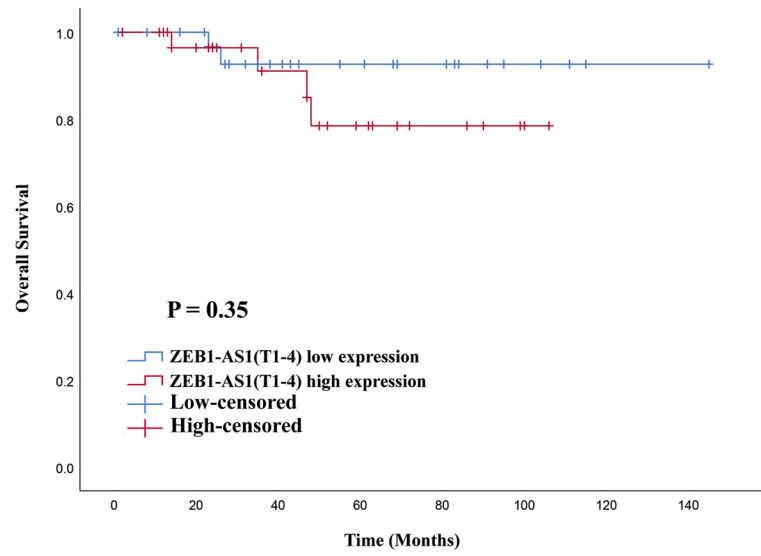

**C**

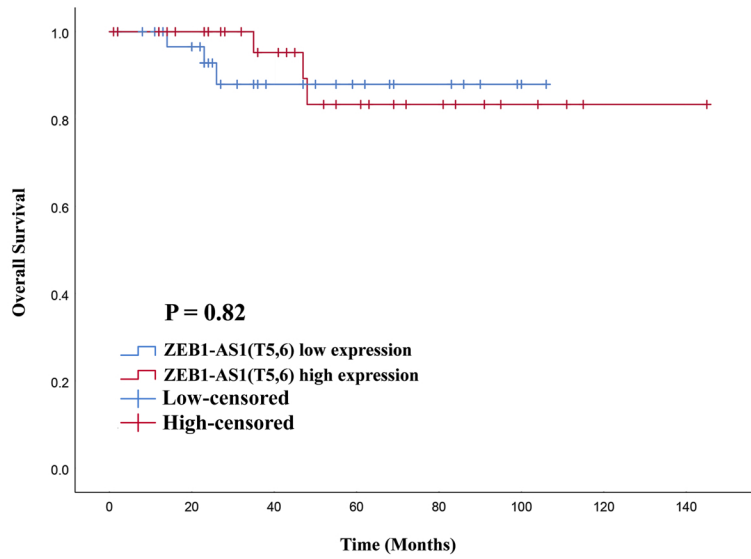

**D**

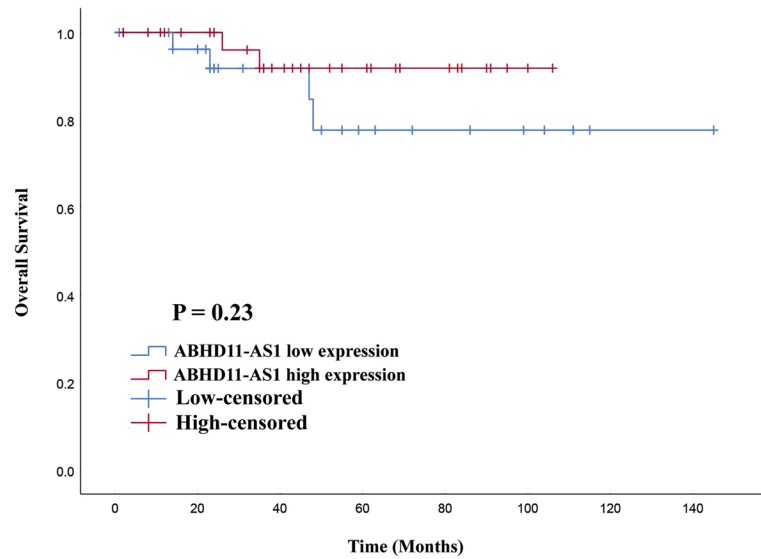

Supplement: MOESM1 [file 19602134]
